# Supplementary material for: Accuracy improvement via novel ratiometry design in distance-based microfluidic paper based analytical device: instrument-free point of care testing
Source: Royal Society of Chemistry journal article supplement (doi:10.1039/d3ra01601c), 2023-01-01
Supplement: d3ra01601c1.pdf [file d3ra01601c1.pdf]

## Electronic Supplementary Materials

### Accuracy Improvement via Novel Ratiometry Design in Distance-Based Microfluidic Paper Based Analytical Device: Instrument-free POCT

Sabah H. Al-Jaf<sup>a,b</sup> and Khalid M. Omer<sup>a\*</sup>

<sup>a</sup> Center of Biomedical Analysis, Department of Chemistry, College of Science, University of Sulaimani, 46002 Sulaimani City, Kurdistan region, Iraq

<sup>b</sup> Department of Chemistry, College of Science, University of Garmian, Darbandikhan Road, 46021, Kalar City-Sulaimaniyah Province, Kurdistan of Iraq

\* Corresponding Email: [khalid.omer@univsul.edu.iq](mailto:khalid.omer@univsul.edu.iq)

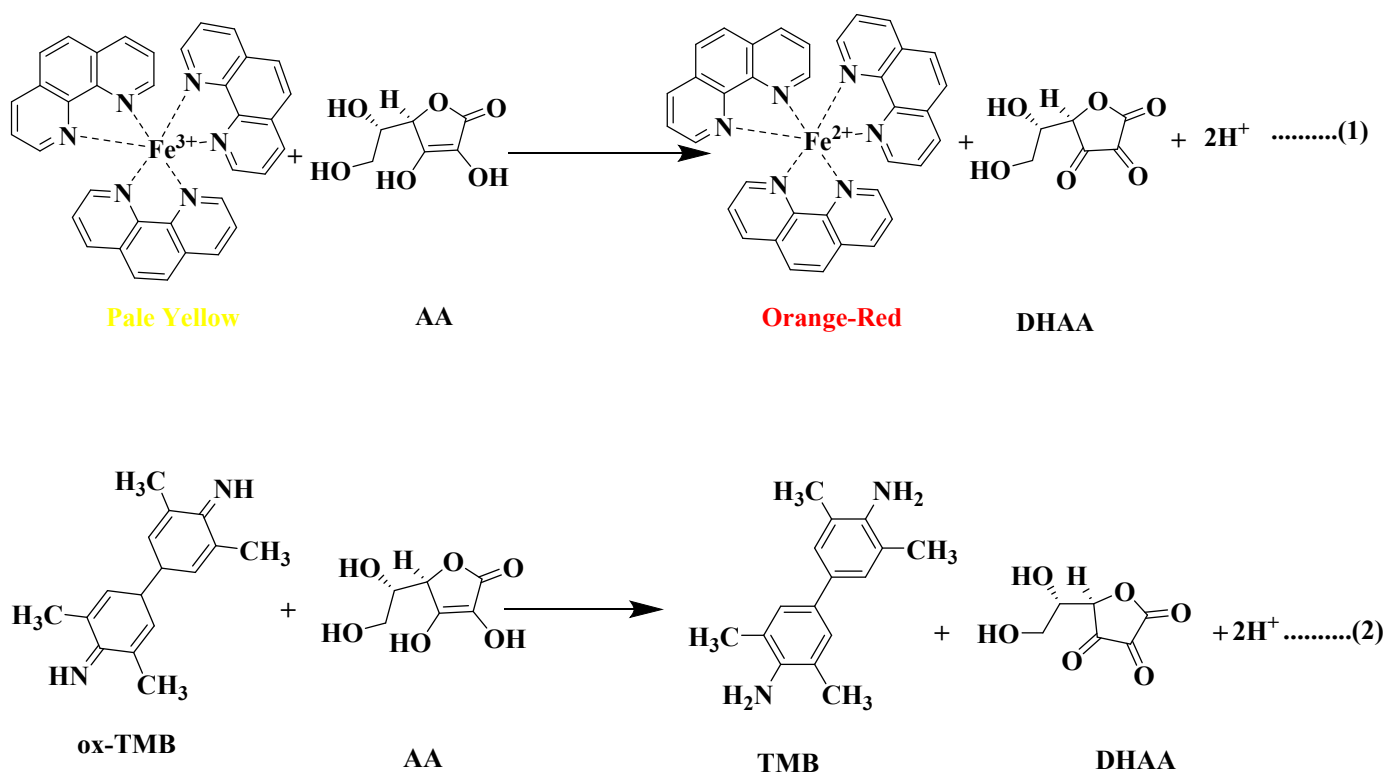

**Figure S1.** The reaction between Fe-1,10-Phenanthroline complex and AA (A), reduction of oxidized TMB to TMB in the presence of AA (B).

**Table 1S**

Comparison of the recoveries obtained for four different AA standards using the proposed distance-based design with and without a 3D connector.

| Standard<br>AA (mM) | Without 3D Connector |            |            | With 3D Connector |            |           | Difference<br>in<br>Error% |
|---------------------|----------------------|------------|------------|-------------------|------------|-----------|----------------------------|
|                     | Found<br>(mM)        | Recovery%  | Error %    | Found<br>(mM)     | Recovery%  | Error%    |                            |
| 0.2                 | 0.173                | 86.5 ± 1.8 | 13.5 ± 1.8 | 0.189             | 94.5 ± 2   | 5.5 ± 2   | 8                          |
| 0.4                 | 0.357                | 89.2 ± 1.2 | 10.7 ± 1.2 | 0.375             | 93.7 ± 1.8 | 6.2 ± 1.8 | 4.5                        |
| 0.6                 | 0.556                | 92.6 ± 1.2 | 7.3 ± 1.2  | 0.578             | 96.3±0.5   | 3.6 ± 0.5 | 3.67                       |
| 0.8                 | 0.773                | 96.6 ± 0.8 | 3.3 ± 0.8  | 0.786             | 98.2 ± 0.7 | 1.7 ± 0.7 | 1.62                       |
